# Supplementary material for: Incorporating statistical strategy into image analysis to estimate effects of steam and allyl isocyanate on weed control
Source: PLoS One. 2019 Sep 30;14(9):e0222695. doi: 10.1371/journal.pone.0222695 (PMC6768448; doi:10.1371/journal.pone.0222695)
Supplement: S1 File — Colors exported by the Image Area Analyzer (http://mkwak.org/imgarea/) when the picture from each microplot was uploaded in the website. (XLSX) [file pone.0222695.s002.xlsx]

## Sheet: Sheet1
C	SD	D	C	D	S	SD	C	S	SD	S	D
