# Supplementary material for: Incorporating statistical strategy into image analysis to estimate effects of steam and allyl isocyanate on weed control
Source: PLoS One. 2019 Sep 30;14(9):e0222695. doi: 10.1371/journal.pone.0222695 (PMC6768448; doi:10.1371/journal.pone.0222695)
Supplement: S3 File — RGB codes created by Excel macro [28]. Each column of col.xlsx, pix.xlsx, and rgb.xlsx are from the same microplot. (XLSX) [file pone.0222695.s004.xlsx]

## Sheet: Sheet1
C	SD	D	C	D	S	SD	C	S	SD	S	D
333333	666666	666666	333333	666666	666666	666666	333333	666666	666666	666666	666633
666666	666666	666666	666666	663333	666666	666666	333333	666666	666633	666633	333333
663333	666666	666666	663333	666666	666666	666666	666666	996666	666666	666666	666666
333333	996666	666666	666633	666633	666666	996666	333333	666666	666666	666666	333333
333333	666666	666666	333333	666666	663333	666666	663333	996666	666666	663333	666666
666633	666666	663333	333333	663333	666633	666666	333333	666666	663333	663333	663333
333333	666666	666666	666666	333333	663333	666666	333333	996666	666666	666666	666666
666666	666633	666633	333333	333333	666666	666633	666666	666666	666666	666666	666666
333300	666666	666666	666666	666666	666666	666666	666633	666666	666666	333333	996666
333333	663333	663333	666666	666633	666666	999999	333333	999999	333333	333333	333333
666666	666666	996666	666633	333333	333333	663333	666666	999966	333333	333333	666633
666666	999999	333333	333333	666666	333333	666666	333333	999999	663333	333333	663333
333333	666666	666666	666666	333333	333333	666666	666666	999999	333333	666666	333333
663333	663333	666666	333333	333333	333333	663333	333300	333333	333333	666666	666666
333333	333333	666633	333300	999999	333333	333333	666666	666633	666666	333333	666666
666666	333333	666666	333333	666666	666666	333333	666633	996666	333333	333333	333333
000000	996666	666666	663333	666666	333333	996666	663333	999966	333333	333333	996666
666633	666666	666666	666666	666666	666633	999999	666666	666666	333333	666666	333300
99CC99	333333	333333	996666	333333	666666	333333	000000	996666	996666	333333	99CC99
666666	666666	666666	666666	666666	333333	333333	333333	663333	999966	333333	CCCC99
99CC99	996666	333333	000000	666666	333333	666666	996666	999999	999999	999966	999966
333333	666633	666666	996666	CC9999	666666	999999	99CC99	333333	333333	333333	333333
99CC66	333333	666666	99CC99	999966	333333	666666	99CC99	999999	999999	666633	666666
666666	996666	999999	333333	333333	996666	666633	999966	999999	333333	666666	333333
CCCC99	333333	666666	999966	666666	666666	666666	666666	666666	CCCCCC	666633	333333
999966	333333	333333	99CC66	333333	666666	333333	CCCC99	666633	333333	CCCCCC	99CC99
99CC66	996666	666666	99CC66	333333	666666	996666	99CC66	666666	666666	666666	99CC66
99CC99	666666	333333	99CC66	333333	333333	333333	CC9999	999999	CCCC99	CC9999	000000
CCCC99	666666	333333	669966	996666	666666	999999	999999	996666	666633	996666	99CC66
99CC66	666666	996666	666666	333333	333333	666666	666666	666666	333333	CCCC99	CCCC99
99CC66	666666	333333	99CC99	333333	666633	666666	99CC99	663333	333333	CC9999	CCCC99
669966	666666	666666	999966	666633	996666	CC9999	99CC99	663333	666633	666666	99CC66
996666	996666	666666	CCCC99	666666	666666	666666	996666	666666	999999	663333	CCCC99
996666	666666	333333	669966	333333	666666	999999	99CC66	333333	996666	666666	999966
666666	666633	999999	999999	666666	666666	999999	99CC66	996666	666666	333333	666666
999966	999999	333333	CCCC99	666666	996666	666666	CCCC99	996666	666666	996666	99CC66
99CC99	666666	CCCCCC	99CC99	666666	666666	333333	99CC99	666666	666666	663333	999999
99CC99	666666	996666	99CC66	666666	999999	666666	99CC66	999966	996666	999999	CCCC99
99CC99	999966	666666	999999	CC9999	999966	CCCC99	330000	999999	CCCC99	FFCCCC	CC9999
330000	333333	333333	999966	666666	666666	666666	999966	999999	666666	666666	99CC66
999966	663333	666666	99CC99	666666	CC9999	666666	999966	666666	666666	CCCC99	999999
669966	663333	666666	99CC99	333333	666666	996666	333300	666666	999966	996666	999966
669933	663333	666666	669966	996666	666666	999966	999966	999966	999966	999999	99CC99
99CC99	999966	333333	99CC99	666666	666666	666666	663366	666666	999966	666666	669966
99CC99	FFCCCC	666633	669966	CCCC99	663333	333333	669966	333333	CC9999	999999	996666
999966	666666	99CC99	996666	999999	CCCC99	CC9999	99CC99	333333	CC9999	999966	996666
CCCC99	999999	99CC99	CCCC99	666666	666666	666666	CCCC99	999966	666666	666666	99CC66
669933	999999	666666	999966	CCCC99	999999	999966	666633	666666	FFCCCC	996666	669966
333300	FFFFCC	999966	666666	999966	999999	CCCCCC	99CC99	666666	663333	996666	CCCC99
999966	999999	666666	CCCC99	666666	663333	663333	333333	666666	000000	CC9999	99CC99
000000	999999	99CC99	CC9999	CCCC99	CCCCCC	666666	996666	666633	996666	333333	99CC99
669933	FFCCCC	666666	666633	666666	663333	666666	996666	CC9999	CC9999	333333	99CC99
CCCC99	CCCC99	333333	999966	333333	996699	666666	999966	333333	666666	999966	CC9999
666633	666666	666666	996666	663333	666666	CC9999	CC9999	666666	663333	666666	666633
999966	999999	996666	99CC66	666666	CC9999	999999	000000	000000	CC9999	666666	999966
99CC66	666666	666666	99CC66	CC9999	333333	663333	996666	666666	666666	333333	999966
999966	999999	666666	996666	666666	663333	663333	666633	999999	996666	333333	996666
999999	CCCCCC	996666	999966	996666	CC9999	996666	99CC99	666633	666666	666666	669966
CCCC99	CC9999	999999	666633	999999	999966	666666	666633	333333	999999	333333	99CC99
99CC66	666666	666666	999966	99CC99	999999	996666	CC9999	CC9999	333300	666666	669933
996666	666666	999966	CC9999	CCCC99	666666	CC9999	CCCC99	999999	333333	666666	666633
99CC66	663333	99CC99	999966	999966	666666	999966	99CC66	996666	666666	666666	666633
99CC66	666666	333333	999966	99CC99	333333	999999	99CC66	999999	666666	333333	333333
669966	333333	333333	66CC66	CCCC99	333333	666666	999966	996666	996666	666666	669933
666633	999999	999999	669966	99CC99	666666	666666	999999	996666	663333	333333	CCCC99
333333	666666	999999	666633	CCCCCC	996666	999966	CC9999	CC9999	CCCCCC	333333	666633
999966	CC9999	996666	999966	666666	333333	996666	669966	333333	666666	666666	999966
999999	996666	333333	666666	666666	999999	996666	CCCC99	999966	999999	663333	669933
666633	333333	999999	666633	99CC99	999999	999999	669966	999999	333333	333333	99CC66
99CC66	666666	999999	999966	666666	333333	999999	999966	996666	999999	663333	999966
999933	666666	99CC99	666666	663333	999999	FFCCCC	999999	666633	666666	666666	333300
99CC99	996699	99CC66	333333	666666	333333	666666	CCCC99	999966	663333	996666	99CC66
666633	999999	CCFFCC	999966	666666	666666	999999	99CC99	666633	666666	CCCCCC	999966
666633	333333	666666	669966	666666	999966	666666	333333	996666	996699	CC9999	999966
333333	FFFFFF	99CC66	333333	99CC66	333300	333333	CCCC99	CC9999	666666	666633	999966
999966	996666	663333	336633	663333	333333	996699	666633	999999	CC9999	333333	330000
99CC66	996666	999999	99CC66	99CC66	333333	999999	CC9999	999999	996666	333300	669966
999999	CC9999	999999	666633	666666	CC9999	CCCC99	666633	663333	333333	996666	666633
669933	333333	663333	666633	99CC99	666666	999966	666666	996666	666666	996666	669966
999966	999999	333333	99CC99	666633	CCCCCC	999999	333333	996666	333333	666666	669966
99CC99	996666	663333	99CC66	666699	333333	FFFFCC	99CC66	666666	996666	666666	99CC66
999966	666666	996699	CC9999	99CC99	330000	999999	999999	999999	996666	000000	666633
666633	CC9999	CC9999	669933	666666	666666	333333	666666	663333	996666	999999	669933
99CC66	333333	CCCC99	669933	CCCC99	FFCCCC	333333	999966	999999	666666	333333	CCCC99
336633	666666	666699	99CC99	666666	333333	666666	999999	666666	666666	333333	666633
99CC99	333333	CC9999	669933	333333	666666	333333	003300	999999	666633	666633	CCCC99
666633	666666	663333	99CC66	663333	CCCCCC	333333	333333	666666	666666	999999	99CC66
666633	CCCCCC	CCFF99	CCCC99	996666	999999	333333	333333	666666	333333	999999	666666
669966	999966	CCFFCC	666633	666666	996666	663333	333366	666666	333333	999966	99CC66
666633	666666	666633	999966	CCCC99	999999	CCCCCC	333333	333333	996666	333333	666633
003300	666633	666666	999966	666666	CCCCCC	666666	99CC99	663333	333333	996666	999933
666666	333333	99CC99	99CC99	996666	999999	CC9999	669966	999999	333333	CCCCCC	999966
666666	999999	666666	999966	999999	333333	999999	666633	999999	666666	333333	666633
999966	999999	666666	CCCCCC	999999	333333	CCCCCC	669933	666666	CCCC99	666633	999966
666666	333333	996666	003300	CCCC99	996666	996666	669966	CC9999	666666	996666	CCCCCC
336633	666633	333300	666666	CCCC99	996666	333333	666666	FFCCCC	999999	996666	999966
669966	666633	999999	99CC99	99CC66	999999	999999	999966	999999	996666	CCCCCC	336633
CCFF99	999999	CCCC99	CCCC99	999999	666666	996666	999966	999999	996666	333333	336633
666633	333333	CCCCCC	99CC66	666666	666633	999999	999999	CCCC99	666666	999999	669933
669966	996666	CC9999	99CC66	333333	999999	999999	999966	666666	999999	666666	666666
333300	999999	333333	669966	333333	999999	333333	666666	663333	CC9999	666666	669966
999966	CCCCCC	CCCCCC	330000	666633	666633	666666	FFCCCC	999966	666666	666666	669933
999999	666666	999966	999999	CCCCCC	996666	666666	999966	666633	999999	666666	336633
996666	CCCC99	663366	996666	333333	333333	999966	999999	999966	CC9999	CCCC99	666666
99CC66	666666	666666	99CC66	99CC99	333333	666633	99CC99	333333	333333	333333	CCCC66
663366	999999	996666	99CC66	99CC66	666633	996666	669966	999999	666633	CC9999	669933
999966	999999	99CC66	669933	996666	CCCC99	999999	996666	CCCC99	333333	666666	99CC66
333300	666666	99CC99	CCFF99	666633	333333	996666	CCFF99	666633	333333	666666	999966
999999	666666	99CC66	666666	CCCC66	996666	666666	669933	999966	999999	999999	003300
CCCC99	999999	99CC99	669933	99CC99	666666	999999	FFCCCC	FFCCCC	999966	666666	999933
CCCC99	996666	996666	669933	666666	999966	333300	CCCCCC	663333	999999	333333	333333
99CC33	666666	666666	CC9999	333333	999999	996666	663333	999999	666666	666666	CC9966
663333	999999	333333	000000	999966	996666	663333	99CC66	CC9999	CCCCCC	CC9999	999966
669933	663333	333333	999966	996666	666666	CC9999	333333	666633	999966	999966	996666
CC9999	666666	666666	999933	663366	333333	666633	999966	666633	666633	999999	333300
999933	666666	999999	333333	333333	663366	996666	999966	CCCC99	999966	663333	996666
CCCCCC	999999	333333	333300	CCCC99	999999	CCCC99	666633	000000	996666	999999	CCCC99
999999	333333	333300	336633	333333	666666	666666	663333	996666	CCCC99	996699	999999
99CC66	999966	FFFFCC	99CC66	999966	999966	666666	999999	CC9999	996666	999999	999966
669933	CCCC99	999999	CC9966	CCCC99	663333	996666	669933	999999	663333	666666	CCCC99
996633	333300	333333	669966	666666	999966	999966	99CC99	999999	CC9999	333333	996666
666633	CC9999	999999	663366	333333	666633	999966	336633	CC9966	333333	666633	999966
666633	663366	CCCC99	CCCC99	999966	996666	333333	663333	999999	CC9999	663333	333300
CCCC99	666633	996666	CCFF99	999966	999999	999966	000000	996699	666666	CC9999	99CC66
999966	CCCCCC	669966	CCFF99	666666	666666	999966	666666	999966	FFCC99	333333	FFCCCC
666666	CC9999	333333	669966	CCCC99	CC9966	666666	669933	663333	666666	666666	CCFF99
336633	333333	CCCC99	CCCC66	666633	CC9999	CCCC99	CCCC99	666633	666666	663333	336633
CCCC99	999966	333333	CCCC99	CCCCCC	666666	000000	666666	999966	333333	CC9966	666666
333333	666666	666666	CC9966	333333	CC9999	CC9999	996666	996666	999999	666666	666633
CCCC66	999966	99CC99	666633	999999	996666	666666	999966	996666	996666	666666	663333
663333	666666	999966	666666	CCCC99	663333	996666	666666	666666	666666	999966	99CC99
999966	663333	666666	99CC66	999999	333333	666666	CCCCCC	666633	666666	663366	666633
669933	333333	666633	336633	333366	666699	663333	669966	CC9999	CC9966	CCCCCC	CCCC66
669933	333333	CC9999	999999	333333	663333	666666	996666	333333	663333	996666	99CC33
99CC66	996666	99CC66	333300	999966	666666	666699	666666	666666	999999	999966	999966
666633	333333	333333	CCCC99	666666	666666	333333	333300	666633	666633	FFFFFF	999999
99CC33	999966	333333	996666	CC9999	666666	666666	CCFF99	663333	666666	666633	CCCC99
999933	663333	333333	999999	999966	666666	666633	666666	666666	996666	333333	336600
999999	996666	666633	FFCCCC	663333	999999	333333	CCCCCC	333300	333333	666666	996633
CC9999	999999	666666	996666	669966	999966	996666	669933	666633	666633	999999	99CC99
996666	FFCCCC	333333	669933	666666	333366	333333	336633	666666	666633	333333	CC9999
999999	333333	996666	663333	666666	663333	663366	333300	666666	333333	333333	CCFF99
CCCCCC	330000	669966	999966	999966	333333	666666	336633	996666	FFFFFF	333333	666666
663333	CC9999	99CC66	CC9999	333300	666666	333333	996633	996666	333333	666666	336600
669966	999999	663333	CCFF99	666666	333333	999999	330033	666666	663366	666666	CCCC99
99CC99	FFFFFF	CCCC99	996666	999966	666666	FFFFFF	999999	CCCCCC	666666	666666	CCCC99
666666	CCCCCC	996666	66CC33	999999	333333	CC9999	999933	999999	663333	666633	99CC33
333300	999999	666666	666666	666666	666633	999999	CCFF99	999999	CCCCCC	FFCC99	333300
CCFF99	999966	999999	669933	CCCC99	999999	999999	663333	333333	333333	666633	999999
CCCCCC	333333	999933	666633	333333	666633	666666	666633	666666	666633	663333	CCCCCC
333333	333333	666666	666633	666666	333333	996666	99CC33	333333	663333	333333	663333
CCCC99	666666	333333	99CC66	99CC33	333333	666666	996666	999999	CC9999	666666	99CC66
CCFF99	333333	999999	333333	CCFF99	666633	999966	669933	666666	666666	666633	663333
336633	666633	CC9966	99CC99	669966	996666	666666	999966	666633	666666	999966	FFCCCC
CC9966	666633	999966	FFCC99	999966	663333	666633	999999	333333	333300	996666	CCCC66
669933	663333	669966	99CC33	CC9966	333333	666666	999999	999966	999966	333366	99CC99
333366	666633	666666	CCCCCC	666633	666666	CC9966	000000	333333	333333	999999	99CC66
996666	666633	999966	996699	333333	666633	333333	333333	333333	996666	666666	CC9999
666633	666666	333333	FFCCCC	669966	663333	663333	333333	333333	666633	999999	99CC66
CCCCCC	663333	999966	999966	CCCC99	666666	333333	999999	666633	CC9966	663333	669999
336633	666666	99CC33	CCCC99	999933	663333	CC9999	FFFFCC	666666	666666	666666	99CC66
996666	333333	333333	663333	CCCCCC	999966	666666	003333	666666	999966	666633	663366
336600	666666	333333	CCCC66	666666	CC9966	999966	999999	666666	666666	666666	666666
663333	666666	333300	999966	333333	996666	666633	333300	999999	999966	333333	996699
CC9999	333333	999999	996666	669966	663333	666666	FFCC99	663333	666666	333300	333300
CCFF99	666633	669933	99CC66	996666	333333	666633	CCFF99	666666	333333	666633	999966
666666	666666	666633	333300	333333	333333	CC9966	000000	333333	333333	666666	CCFF99
333300	663333	333333	996633	666633	333333	663333	333300	666666	996666	663333	CCCCCC
663333	666699	996666	669933	666633	FFFFFF	663333	666633	996666	663333	666699	669966
996633	666666	669933	663333	996666	996666	333333	99CC66	999999	666699	333333	CCCCCC
666666	CC9966	669966	CCCC66	666666	666633	996666	99CC66	666666	663333	996666	336633
996633	663333	666633	663333	666666	333300	666666	CCCC99	666666	666666	666666	663333
999966	999999	663333	CCCCCC	333333	333333	333333	CC9999	333333	663333	333333	999933
99CC33	333333	999999	99CC99	666666	999966	CC9966	333333	666633	666633	666666	CCCC66
99CC66	333300	333333	996666	333333	666666	333333	336600	CC9966	666633	333333	996633
996699	666666	669933	CC9999	666666	333333	663333	330000	996666	666666	996666	CC9966
333333	996633	666633	669933	333333	996666	666666	336666	996666	996666	333333	CCCC66
CCCC66	666666	663333	999933	336633	666666	666666	996699	663366	333333	663333	333300
99CC66	999966	669933	333333	333333	999966	333333	996666	999999	666666	CC9999	333300
333333	999966	663333	336600	666633	333333	333366	CC9999	CC9966	666666	333333	CCFF99
996666	666666	996666	333366	333300	666666	666666	000000	999966	333333	666666	333333
666666	996666	666666	CC9966	999966	663333	999999	FFFFFF	666666	333333	663333	666666
CCCC99	CCCCCC	333333	666666	666633	330000	999966	CC9966	999999	996666	999966	CCCCCC
333333	996666	333366	996666	663333	333333	996666	996666	666666	996666	333333	666666
CCCC66	663333	666633	666666	333333	999999	666633	000033	996633	333333	663333	996666
336600	666633	333333	666633	333333	333300	333333	666699	333333	333333	333333	666666
336633	333366	666633	999966	666666	663333	333333	99CC66	999999	996666	333333	333333
000000	999999	666633	CCCC66	666633	333333	999966	669999	333333	666666	996633	99CC66
999933	333333	666666	CC9966	336633	996666	999999	333300	663333	666633	333333	CC9966
333300	663333	669966	FF9999	FFCC99	666666	663333	666633	666633	333366	333333	CCCC99
CCCCCC	999999	333333	333333	333333	996633	333333	CCCC66	663333	663333	996666	336666
666633	996666	666633	996666	666666	666633	333333	CC9999	996666	333333	666666	669966
333333	663333	666633	999999	666633	333333	333300	666666	999966	666666	666666	333366
FFFFCC	996666	666666	CC9966	663333	333333	996666	666600	996633	333333	333333	666699
336633	333333	666633	CCFF66	666633	996666	999966	999999	999966	333333	663333	CC9999
FFCC99	333333	336633	996633	336633	333333	336633	FF9999	666666	663333	333333	CCFF99
99CC66	996666	999966	333300	999999	666666	996666	663333	666699	666666	333333	333333
336666	333333	663333	FFFFCC	666633	666666	666666	996666	996666	666666	666666	999999
333333	663333	336633	663333	666666	996633	999999	996633	663333	996633	996666	CC9966
663333	666666	666666	333333	333333	666633	996666	996666	336633	333333	CC9966	996666
333300	999966	666666	CCCC66	999966	333333	333333	CCCC66	999999	000000	333333	666633
CCCC66	666633	996666	CCCC33	CCCC99	333333	666666	333300	996666	CC9966	996633	333333
333300	666633	666633	99CC33	666633	666666	663333	999999	333333	333333	000000	CC9999
000000	996633	666633	999933	669933	333333	996666	996633	333333	663333	333333	99CC33
669900	666666	996666	669999	669933	666666	333333	99CC33	666666	333333	666666	999966
666666	669999	336633	666699	669933	666666	999966	663333	333366	663333	333333	669966
CCCC66	666666	333333	CCFF99	336633	333333	333333	999966	666633	663333	999966	CCFF99
333333	666666	666633	333333	663333	336633	CC9999	CC9966	666666	333333	CC9966	CC9966
669900	333333	333300	669966	996666	336666	996633	CCFF99	333333	996666	666633	996633
99CCCC	996633	336633	FFCC99	666666	666666	996666	FFCC99	999999	666666	663333	CCCC99
330033	333333	666666	663333	333333	999999	663333	669900	FFFFFF	666633	669999	FFCC99
999933	666666	663333	999999	FFCCCC	999999	333333	669966	999999	336633	996666	333333
996666	666666	333333	CC9999	666633	996666	666666	999999	666633	996633	333333	666666
CCCC99	999999	663333	996633	996666	666633	333333	99CC99	000000	663333	336633	996666
663300	666666	333333	99CC99	666633	333333	333333	CCCCCC	666633	333333	666666	CCCCCC
003333	666699	FFFFFF	CCFF66	666666	333333	666666	669933	666666	666666	999999	996666
669999	663333	666666	CCCC33	333333	669999	666666	996633	336633	333333	666633	003333
669900	666633	333333	666633	996633	666666	333333	CC9999	996633	666666	333333	996633
999999	666666	333300	CC6666	333333	669966	666633	333300	999999	999999	999966	996633
99CC99	666666	336633	996633	666633	666666	666666	666633	333333	333333	666666	99CC66
663300	336633	333333	669966	333333	333333	666666	99CC99	666666	996666	336666	663333
999999	666666	663333	99CC99	333333	663333	666666	996633	999966	333333	666666	99CC99
663333	663333	333333	003333	666666	666666	663333	999999	666666	333333	666666	333333
000033	663333	666666	66CC33	666666	999999	666666	666666	666633	666666	996666	000033
663333	663300	666633	333300	333333	663333	996633	000000	999999	669966	333333	CCCC33
666666	996666	336666	666666	336633	333333	999999	669966	999999	663366	996633	333300
000000	999999	333333	336666	663333	663333	999966	999999	999999	333333	666666	663333
996666	666666	666666	333333	336666	663300	666666	663366	666666	666666	999999	FFCC99
CCCCCC	336666	336633	996666	663333	666666	666633	663300	666666	336666	663333	663300
CC6666	666666	336633	66CC66	666666	996633	333333	663333	999999	666633	669966	99CC99
666699	333333	333333	FF9999	666666	99CC99	000000	996666	663333	666666	663366	CCCCCC
CCFF66	666666	666666	330033	666666	666633	999999	996666	666666	333333	663333	CCFF66
99CC99	669966	666666	333333	999933	663333	669999	999999	996666	666666	666666	999999
663366	666666	666666	333300	333333	996666	666666	999999	663366	666666	333333	000000
330000	663366	666666	663333	666633	999966	336666	000000	663333	999999	666666	CCCCCC
99CCCC	999999	996633	663366	666666	999999	669966	CCFF66	666633	666666	666633	996666
999999	333333	996666	66CC66	663333	333333	663366	663300	666666	666666	666666	330033
996633	666666	333300	FFFFFF	333333	666633	333333	999999	669966	666666	666666	CC9966
FFFFFF	996666	336633	663333	669966	CC9966	999999	330000	333333	666633	333333	996666
000000	996633	333333	996666	333333	999966	663333	333333	663333	666666	333333	99CCCC
CC6699	333333	333333	000033	333333	666666	996666	FF9999	663333	666666	666666	996666
99CC99	999999	666666	996666	333333	000000	666633	FF9999	999999	666633	666666	996666
336666	666633	669999	996666	663333	663366	666666	996666	666633	999999	666633	996633
669966	99CCCC	663333	333300	666633	663333	999966	CC9999	666633	336633	333333	663366
996666	000000	666633	993366	996666	666666	666666	CC9966	999999	996666	663333	FFFFFF
003300	333333	663366	333333	663333	666633	999999	996666	999999	999966	CC9966	663333
000000	999999	996666	663366	333333	666666	336633	CCCC33	999999	666666	666666	330000
333333	333333	663300	663300	663333	333333	996666	996666	666666	999966	336633	CCCCCC
996666	336633	666666	333300	663366	333333	666666	CC6633	669999	666666	996666	663366
996666	666666	666666	99CC66	666666	666666	663333	663366	999966	666633	333333	99CCCC
663366	663333	000000	000000	663333	666633	999999	663333	666633	333333	666666	333333
FFCC66	666666	663333	996666	666666	996666	666666	993333	666666	669999	333333	99CC66
663333	666666	996666	330000	FFFFFF	333333	666666	660000	666633	663333	666633	663333
330033	666633	333333	99CC66	333333	666633	333333	660033	666666	99CCCC	666666	66CC66
FFFFFF	FFFFFF	663333	663333	000000	663333	666666	663333	666666	663333	663333	330033
