# Supplementary material for: Incorporating statistical strategy into image analysis to estimate effects of steam and allyl isocyanate on weed control
Source: PLoS One. 2019 Sep 30;14(9):e0222695. doi: 10.1371/journal.pone.0222695 (PMC6768448; doi:10.1371/journal.pone.0222695)
Supplement: S4 File — Data to test the reliability of using smart phones (estimated green proportions in twenty plots by three smart phones). (XLSX) [file pone.0222695.s005.xlsx]

## Sheet: Data
Plot	SmartPhone1	SmartPhone2	SmartPhone3
1	0.277614	0.358276	0.393099
2	0.304336	0.302625	0.341109
3	0.415008	0.337478	0.379794
4	0.633348	0.801982	0.772191
5	0.453722	0.629756	0.626666
6	0.462626	0.617408	0.570327
7	0.47124	0.626815	0.630645
8	0.357785	0.40495	0.356403
9	0.442366	0.403271	0.397211
10	0.562131	0.511058	0.533703
11	0.537413	0.490158	0.483645
12	0.455021	0.577115	0.563323
13	0.412988	0.399375	0.430169
14	0.0658553	0.0588512	0.061367
15	0.244358	0.356463	0.272436
16	0.209153	0.150803	0.202917
17	0.482153	0.552336	0.469851
18	0.202422	0.270555	0.307335
19	0.465295	0.547698	0.535132
20	0.166288	0.206319	0.276764
